# Supplementary material
Source: Springer Nature journal article supplement (https://www.springermedizin.de/resource/supplementary/12911_2013_789_MOESM2_ESM.pdf/9526656)
Supplement: MOESM2 [file 9526656]

Identification of tracer events

Aggregation into states

| ID | SOURCE | STRUCTURE | CODES/PROCEDURES | DATE       | EVENT            |
|----|--------|-----------|------------------|------------|------------------|
| 1  | AP     | 17CBLAR   | BHGSA7B2         | 20/06/2008 | Biopsy           |
| 1  | HD     | 44CRLCC   | Z511 (C509)      | 11/07/2008 | Chemotherapy     |
| 1  | HD     | 44CRLCC   | Z511 (C509)      | 01/08/2008 | Chemotherapy     |
| 1  | HD     | 44CRLCC   | Z511 (C509)      | 22/08/2008 | Chemotherapy     |
| 1  | HD     | 44CRLCC   | Z511 (C509)      | 12/09/2008 | Chemotherapy     |
| 1  | HD     | 79PCINK   | C502 / QEFA001   | 04/10/2008 | Surgery and LNR* |
| 1  | AP     | 17CBLAR   | OHGSA7B2         | 04/10/2008 | Surgery          |
| 1  | HD     | 79CHNIO   | Z5100 (C509)     | 21/01/2009 | Radiotherapy     |
| 1  | HD     | 79CHNIO   | Z5100 (C509)     | 22/01/2009 | Radiotherapy     |
| 1  |        |           | ...              | ...        | Radiotherapy     |
| 1  | HD     | 79CHNIO   | Z5100 (C509)     | 01/03/2009 | Radiotherapy     |
| 1  | HD     | 79CHNIO   | Z5100 (C509)     | 02/03/2009 | Radiotherapy     |

| STATE     | CHAR |
|-----------|------|
| AP        | A    |
| CT_NEO    | N    |
| SURG + AP | D    |
| RT        | R    |
| RT        |      |
| ...       |      |
| RT        |      |

Simple form

| ORDER | CHAR |
|-------|------|
| 1     | A    |
| 2     | N    |
| 3     | D    |
| 4     | R    |

|   |   |   |   |
|---|---|---|---|
| A | N | D | R |
|---|---|---|---|

Representation of sequences

Extended form

| START | END | TIME | CHAR |
|-------|-----|------|------|
| 1     | 1   | 1    | A    |
| 2     | 21  | 20   | I    |
| 22    | 85  | 64   | N    |
| 86    | 106 | 21   | I    |
| 107   | 107 | 1    | D    |
| 108   | 215 | 108  | I    |
| 216   | 256 | 41   | R    |

Calculation of time-lapses

|   |   |     |    |    |     |    |    |     |     |     |     |     |     |     |     |     |
|---|---|-----|----|----|-----|----|----|-----|-----|-----|-----|-----|-----|-----|-----|-----|
| 1 | 2 | ... | 21 | 22 | ... | 85 | 86 | ... | 106 | 107 | 108 | ... | 215 | 216 | ... | 256 |
| A | I | ... | I  | N  | ... | N  | I  | ... | I   | D   | I   | ... | I   | R   | ... | R   |

65

(duration of neoadjuvant medical  
treatment by chemotherapy)

109

(time-lapse to radiotherapy)
